# Supplementary material for: The Burden of Bereavement: Early-Onset Depression and Impairment in Youths Bereaved by Sudden Parental Death in a 7-Year Prospective Study
Source: Atypon-hosted journal article supplement (doi:10.1176/appi.ajp.2018.17070792), 2018-06-20
Supplement: appi.ajp.2018.17070792.ds001.pdf [file appi.ajp.2018.17070792.ds001.pdf]

Data supplement for Pham et al., The Burden of Bereavement: Early-Onset Depression and Impairment in Youths Bereaved by Sudden Parental Death in a 7-Year Prospective Study. Am J Psychiatry (doi: 10.1176/appi.ajp.2018.17070792)

**Table S1: Assessment Instruments for Youth and Adults**

| <b>Domain</b>                    | <b>Child</b>                                                | <b>Adult</b>                                                         |
|----------------------------------|-------------------------------------------------------------|----------------------------------------------------------------------|
| PTSD                             | Child PTSD Symptom Scale                                    | PTSD Symptom Scale                                                   |
|                                  | Interview <sup>1</sup>                                      | Interview <sup>2</sup>                                               |
| Anxiety                          | Screen for Anxiety Related Emotional Disorders <sup>3</sup> | Beck Anxiety Inventory <sup>4</sup>                                  |
|                                  |                                                             |                                                                      |
| Depression                       | Mood and Feelings Questionnaire <sup>5</sup>                | Beck Depression Inventory <sup>6</sup>                               |
|                                  |                                                             |                                                                      |
| Impulsive Aggression             | Aggression Questionnaire <sup>7</sup>                       | Aggression Questionnaire <sup>7</sup>                                |
| Suicidal Ideation                | Suicidal Ideation Questionnaire- Jr. <sup>8</sup>           | Suicidal Ideation Questionnaire-Jr. <sup>8</sup>                     |
|                                  |                                                             |                                                                      |
| Intercurrent Life Events         | Life Events Checklist <sup>9</sup>                          | Shortened Holmes-Rahe Social Readjustment Rating Scale <sup>10</sup> |
|                                  |                                                             |                                                                      |
| Physical or sexual abuse history | Abuse Dimensions Inventory. <sup>11</sup>                   | Abuse Dimensions Inventory. <sup>11</sup>                            |
|                                  |                                                             |                                                                      |
| Coping                           | Kidcope <sup>12</sup>                                       | Ways of Coping <sup>13</sup>                                         |
| Social Support                   | Survey of Children's Social Support <sup>14</sup>           | Multi-dimensional Scale of Perceived Social Support <sup>15</sup>    |
|                                  |                                                             |                                                                      |

---

Family climate

Family Adaptability and

Family Adaptability and

Cohesion Evaluation-II<sup>16</sup>

Cohesion Evaluation-II<sup>16</sup>

---

**Table S2: Demographic, Clinical and Psychological Characteristics at 7-Year Assessment by Bereavement Status - Participants who completed the year-7 assessment only.**

|                                                  | Non          |              |              | Test          | df     | P      |
|--------------------------------------------------|--------------|--------------|--------------|---------------|--------|--------|
|                                                  | Total        | Bereaved     | Bereaved     |               |        |        |
| <b>Offspring</b>                                 |              |              |              |               |        |        |
| <b>No.</b>                                       | <b>262</b>   | <b>132</b>   | <b>130</b>   |               |        |        |
| Age, M(SD)                                       | 18.9 (3.2)   | 18.7 (2.9)   | 19.1 (3.5)   | t=-0.97       | 250.31 | 0.33   |
| <b>Offspring Psychiatric Disorders</b>           |              |              |              |               |        |        |
| Depression, N (%Yes)                             | 55 (21.0)    | 24 (18.2)    | 31 (23.9)    | $\chi^2=1.27$ | 1      | 0.26   |
| Bipolar Disorder, N (%Yes)                       | 13 (5.0)     | 3 (2.3)      | 10 (7.7)     | $\chi^2=4.08$ | 1      | 0.04   |
| Anxiety, N (%Yes)                                | 43 (16.4)    | 19 (14.4)    | 24 (18.5)    | $\chi^2=0.79$ | 1      | 0.37   |
| PTSD, N (%Yes)                                   | 13 (5.0)     | 3 (2.3)      | 10 (7.7)     | $\chi^2=4.08$ | 1      | 0.04   |
| ADHD, N (%Yes)                                   | 29 (11.1)    | 15 (11.4)    | 14 (10.8)    | $\chi^2=0.02$ | 1      | 0.88   |
| Behavior Disorder, N (%Yes)                      | 8 (3.1)      | 4 (3.0)      | 4 (3.1)      | FET           | -      | >0.99  |
| Alcohol/Substance Abuse, N (%Yes)                | 49 (18.7)    | 25 (18.9)    | 24 (18.5)    | $\chi^2=0.01$ | 1      | 0.92   |
| Any Psychiatric Disorder, N (%Yes)               | 127 (48.5)   | 56 (42.4)    | 71 (54.6)    | $\chi^2=3.90$ | 1      | 0.05   |
| Offspring Functioning, M(SD)                     | 76.1 (12.5)  | 78.8 (11.5)  | 73.3 (12.8)  | t=3.70        | 260    | <0.001 |
| <b>Offspring Self-Reported Clinical Measures</b> |              |              |              |               |        |        |
| Depression, M(SD)                                | -0.11 (0.94) | -0.18 (0.90) | -0.03 (0.98) | t=-1.25       | 232    | 0.21   |
| Anxiety, M(SD)                                   | -0.18 (0.94) | -0.24 (0.90) | -0.11 (0.98) | t=-1.10       | 233    | 0.27   |
| Suicidal Ideation, M(SD)                         | 20.9 (9.3)   | 18.5 (5.0)   | 23.5 (11.9)  | t=-4.17       | 147.82 | <0.001 |
| Impulsive Aggression, M(SD)                      | 64.4 (20.0)  | 62.8 (20.5)  | 66.2 (19.4)  | t=-1.30       | 238    | 0.19   |

|                                    | Non          |              |              | Test          | df     | P     |
|------------------------------------|--------------|--------------|--------------|---------------|--------|-------|
|                                    | Total        | Bereaved     | Bereaved     |               |        |       |
| PTSD, M(SD)                        | 2.7 (5.7)    | 1.6 (5.1)    | 3.8 (6.1)    | t=-3.08       | 251.39 | 0.002 |
| Negative coping Strategies, M(SD)  | -0.10 (0.99) | -0.06 (1.03) | -0.15 (0.95) | t=0.73        | 233    | 0.46  |
| Family Climate, M(SD)              | 52.4 (9.7)   | 54.3 (9.4)   | 50.2 (9.5)   | t=3.36        | 235    | 0.001 |
| Intercurrent Life Events, M(SD)    | 0.15 (0.96)  | 0.15 (0.97)  | 0.16 (0.96)  | t=-0.06       | 260    | 0.95  |
| Social Support, M(SD)              | 0.06 (0.87)  | 0.16 (0.92)  | -0.06 (0.80) | t=1.93        | 237    | 0.06  |
| <b>Surviving Caretaking Adult</b>  |              |              |              |               |        |       |
| <b>No.</b>                         | <b>163</b>   | <b>86</b>    | <b>77</b>    |               |        |       |
| Depression, N (%Yes)               | 41 (26.0)    | 18 (26.9)    | 23 (25.3)    | $\chi^2=0.05$ | 1      | 0.82  |
| Bipolar Disorder, N (%Yes)         | 5 (3.2)      | 2 (3.0)      | 3 (3.3)      | FET           | -      | >0.99 |
| Anxiety, N (%Yes)                  | 22 (13.9)    | 6 (9.0)      | 16 (17.6)    | $\chi^2=2.40$ | 1      | 0.12  |
| PTSD, N (%Yes)                     | 10 (6.3)     | 1 (1.5)      | 9 (9.9)      | FET           | -      | 0.05  |
| Alcohol/Substance Abuse, N (%Yes)  | 12 (7.6)     | 3 (4.5)      | 9 (9.9)      | $\chi^2=1.61$ | 1      | 0.20  |
| Any Psychiatric Disorder, N (%Yes) | 64 (40.5)    | 24 (35.8)    | 40 (44.0)    | $\chi^2=1.06$ | 1      | 0.30  |
| Functioning, M(SD)                 | 77.1 (11.2)  | 80.6 (9.8)   | 74.3 (11.4)  | t=3.53        | 137.6  | 0.001 |

Abbreviations: M, mean. SD, standard deviation. FET, Fisher's exact test. PTSD, Post-Traumatic Stress Disorder. ADHD, Attention Deficit Disorder, Hyperactivity. Behavior Disorder: conduct disorder, oppositional defiant disorder.

**Table S3. Incident Depression by Bereavement Status after Controlling for Covariates**

|                                                            | (a)<br>Without Interaction |       |        | (b)<br>With Interaction |       |        |
|------------------------------------------------------------|----------------------------|-------|--------|-------------------------|-------|--------|
|                                                            | HR (95% CI)                | t     | P      | HR (95% CI)             | t     | P      |
| Bereavement                                                | 2.67 (1.58, 4.51)          | 3.68  | <0.001 | 19.77 (3.71, 105.39)    | 3.49  | <0.001 |
| Age at Parent's Death                                      | 1.04 (0.98, 1.10)          | 1.36  | 0.17   | 1.17 (1.04, 1.31)       | 2.76  | 0.01   |
| Female Sex                                                 | 1.47 (1.04, 2.07)          | 2.20  | 0.03   | 1.45 (1.03, 2.03)       | 2.15  | 0.03   |
| White Race                                                 | 1.20 (0.75, 1.93)          | 0.76  | 0.45   | 1.12 (0.69, 1.82)       | 0.48  | 0.63   |
| Socio-economic Status                                      | 0.98 (0.97, 0.99)          | -2.18 | 0.03   | 0.98 (0.97, 0.99)       | -2.43 | 0.02   |
| Bereavement by Age at Parent's Death                       | --                         | --    | --     | 0.85 (0.75, 0.97)       | -2.44 | 0.02   |
| History of Psychiatric Disorder (offspring)                | 1.43 (0.97, 2.13)          | 1.79  | 0.07   | 1.47 (0.99, 2.18)       | 1.95  | 0.05   |
| History of Psychiatric Disorder (parent)                   | 0.74 (0.43, 1.27)          | -1.10 | 0.27   | 0.70 (0.42, 1.17)       | -1.37 | 0.17   |
| Physical/Sexual Abuse                                      | 1.31 (0.63, 2.71)          | 0.73  | 0.47   | 1.25 (0.60, 2.59)       | 0.59  | 0.56   |
| Correction for Proportional Hazard Violation (Bereavement) | 0.98 (0.97, 0.99)          | -2.50 | 0.01   | 0.98 (0.97, 0.99)       | -2.48 | 0.01   |

Abbreviations: HR, Hazard Ratio. CI, Confidence Interval.

**Table S3 (cont'd)**

|                                                            | (c)<br>Age at Parent's Death<br>12 and Younger |       |        | (d)<br>Age at Parent's Death<br>13 and Older |       |      |
|------------------------------------------------------------|------------------------------------------------|-------|--------|----------------------------------------------|-------|------|
|                                                            | HR (95% CI)                                    | t     | P      | HR (95% CI)                                  | t     | P    |
| Bereavement                                                | 4.92 (2.04, 11.87)                             | 3.55  | <0.001 | 1.15 (0.69, 1.90)                            | 0.54  | 0.59 |
| Age at Parent's Death                                      | 0.98 (0.85, 1.12)                              | -0.34 | 0.74   | 0.93 (0.79, 1.08)                            | -0.97 | 0.33 |
| Female Sex                                                 | 1.18 (0.72, 1.94)                              | 0.66  | 0.51   | 1.92 (1.19, 3.09)                            | 2.67  | 0.01 |
| White Race                                                 | 0.89 (0.42, 1.90)                              | -0.30 | 0.76   | 1.24 (0.66, 2.34)                            | 0.67  | 0.50 |
| Socio-economic Status                                      | 0.98 (0.96, 1.01)                              | -1.50 | 0.13   | 0.98 (0.97, 1.003)                           | -1.70 | 0.09 |
| History of Psychiatric Disorder (offspring)                | 0.95 (0.47, 1.93)                              | -0.15 | 0.88   | 2.00 (1.19, 3.35)                            | 2.63  | 0.01 |
| History of Psychiatric Disorder (parent)                   | 0.54 (0.27, 1.07)                              | -1.77 | 0.08   | 0.87 (0.40, 1.87)                            | -0.36 | 0.72 |
| Physical/Sexual Abuse                                      | 1.99 (0.76, 5.24)                              | 1.39  | 0.16   | 1.01 (0.38, 2.73)                            | 0.03  | 0.98 |
| Correction for Proportional Hazard Violation (Bereavement) | 0.98 (0.96, 1.001)                             | -1.84 | 0.07   | --                                           | --    | --   |

Abbreviations: HR, Hazard Ratio. CI, Confidence Interval.

**Table S4. Incident PTSD by Bereavement Status after Controlling for Covariates**

|                                                | <b>HR (95% CI)</b> | <b>t</b> | <b>P</b> |
|------------------------------------------------|--------------------|----------|----------|
| Bereavement                                    | 5.66 (1.95, 16.40) | 3.19     | 0.001    |
| Age at Parent's Death                          | 0.89 (0.79, 0.99)  | -2.11    | 0.04     |
| Female Sex                                     | 1.43 (0.71, 2.89)  | 1.01     | 0.31     |
| White Race                                     | 1.11 (0.39, 3.19)  | 0.20     | 0.84     |
| Socio-economic Status                          | 0.99 (0.97, 1.03)  | -0.29    | 0.77     |
| History of Psychiatric Disorder<br>(offspring) | 2.83 (1.28, 6.27)  | 2.57     | 0.01     |
| History of Psychiatric Disorder<br>(parent)    | 2.03 (0.42, 9.75)  | 0.88     | 0.38     |
| Physical/Sexual Abuse                          | 1.38 (0.45, 4.22)  | 0.57     | 0.57     |

Abbreviations: HR, Hazard Ratio. CI, Confidence Interval.

**Table S5. Incident Clinically Significant Suicidal Ideation by Bereavement Status after Controlling for Covariates**

|                                                | <b>HR (95% CI)</b> | <b>t</b> | <b>P</b> |
|------------------------------------------------|--------------------|----------|----------|
| Bereavement                                    | 1.50 (0.91, 2.46)  | 1.59     | 0.11     |
| Age at Parent's Death                          | 0.99 (0.92, 1.07)  | -0.21    | 0.83     |
| Female Sex                                     | 1.77 (1.14, 2.76)  | 2.53     | 0.01     |
| White Race                                     | 1.12 (0.66, 1.89)  | 0.42     | 0.68     |
| Socio-economic Status                          | 0.99 (0.97, 1.01)  | -1.10    | 0.27     |
| History of Psychiatric Disorder<br>(offspring) | 2.42 (1.55, 3.78)  | 3.87     | <0.001   |
| History of Psychiatric Disorder<br>(parent)    | 0.62 (0.33, 1.18)  | -1.46    | 0.14     |
| Physical/Sexual Abuse                          | 1.67 (0.84, 3.32)  | 1.47     | 0.14     |

Abbreviations: HR, Hazard Ratio. CI, Confidence Interval.



**Table S6. Course of Disorders by Bereavement Status after Controlling for Covariates**

|                 | Depression         |       |        | Alcohol/Substance    |       |        | Suicidal ideation |       |        |
|-----------------|--------------------|-------|--------|----------------------|-------|--------|-------------------|-------|--------|
|                 | OR (95% CI)        | t     | P      | OR (95% CI)          | t     | P      | OR (95% CI)       | t     | P      |
| Bereavement     | 9.87 (4.26, 22.85) | 5.34  | <0.001 | 17.31 (1.05, 284.70) | 2.00  | 0.05   | 2.02 (0.82, 4.97) | 1.54  | 0.13   |
| Time            | 1.61 (1.30, 2.01)  | 4.29  | <0.001 | 8.83 (4.20, 18.56)   | 5.75  | <0.001 | 0.89 (0.69, 1.15) | -0.88 | 0.38   |
| Bereavement by  |                    |       |        |                      |       |        |                   |       |        |
| Time            | 0.62 (0.48, 0.81)  | -3.54 | <0.001 | 0.52 (0.25, 1.11)    | -1.68 | 0.09   | 1.33 (0.97, 1.82) | 1.75  | 0.08   |
| Age at Parent's |                    |       |        |                      |       |        |                   |       |        |
| Death           | 1.09 (0.99, 1.19)  | 1.95  | 0.05   | 1.76 (1.38, 2.23)    | 4.58  | <0.001 | 1.01 (0.90, 1.13) | 0.13  | 0.90   |
| Female Sex      | 2.33 (1.41, 3.82)  | 3.33  | 0.001  | 0.21 (0.07, 0.66)    | -2.70 | 0.01   | 3.06 (1.54, 6.10) | 3.18  | 0.001  |
| White Race      | 1.44 (0.68, 3.04)  | 0.95  | 0.34   | 0.45 (0.09, 2.18)    | -0.99 | 0.32   | 1.18 (0.47, 2.96) | 0.36  | 0.72   |
| Socio-economic  |                    |       |        |                      |       |        |                   |       |        |
| Status          | 0.98 (0.95, 1.003) | -1.73 | 0.09   | 1.01 (0.96, 1.07)    | 0.38  | 0.70   | 0.98 (0.95, 1.01) | -1.52 | 0.13   |
| History of      |                    |       |        |                      |       |        |                   |       |        |
| Psychiatric     |                    |       |        |                      |       |        |                   |       |        |
| Disorder        |                    |       |        |                      |       |        |                   |       |        |
| (offspring)     | 3.84 (2.18, 6.76)  | 4.67  | <0.001 | 4.02 (1.18, 13.65)   | 2.33  | 0.03   | 4.52 (2.08, 9.81) | 3.82  | <0.001 |

|                                                |                   |       |      |                    |      |      |                   |       |      |
|------------------------------------------------|-------------------|-------|------|--------------------|------|------|-------------------|-------|------|
| History of<br>Psychiatric<br>Disorder (parent) | 0.68 (0.29, 1.59) | -0.90 | 0.37 | 4.80 (0.53, 43.27) | 1.40 | 0.16 | 0.26 (0.10, 0.70) | -2.67 | 0.01 |
| Physical/Sexual<br>Abuse                       | 1.93 (0.88, 4.25) | 1.64  | 0.10 | 3.23 (0.76, 13.68) | 1.59 | 0.11 | 1.34 (0.49, 3.70) | 0.56  | 0.57 |

Abbreviations: OR, Odds Ratio. CI, Confidence Interval.

**Table S7. Logistic Regressions for the Relationship between Bereavement and 7-Year Functional Impairment Controlling for Covariates at Each Time Point**

|                                         |                                             | Odds Ratio                |       |        |
|-----------------------------------------|---------------------------------------------|---------------------------|-------|--------|
|                                         |                                             | (95% Confidence Interval) | t     | P      |
| Prior to death                          | Bereavement                                 | 2.38 (1.28, 4.43)         | 2.73  | 0.01   |
|                                         | History of Psychiatric Disorder (Offspring) | 6.39 (3.36, 12.15)        | 5.65  | <0.001 |
| 9-months after death                    | Bereavement                                 | 1.70 (0.90, 3.21)         | 1.65  | 0.10   |
|                                         | Self-reported depression                    | 1.35 (0.97, 1.87)         | 1.77  | 0.08   |
|                                         | Social Support                              | 0.62 (0.43, 0.90)         | -2.52 | 0.01   |
|                                         | Negative Life Events                        | 1.60 (1.20, 2.15)         | 3.15  | 0.002  |
| Average score at the next 3 time points | Bereavement                                 | 1.77 (0.93, 3.39)         | 1.73  | 0.08   |
|                                         | Self-reported depression                    | 2.89 (1.87, 4.45)         | 4.81  | <0.001 |
|                                         | Negative Life Events                        | 4.07 (1.97, 8.41)         | 3.80  | <0.001 |

**Figure S1: Kaplan-Meier Curves for Incident Functional Impairment**

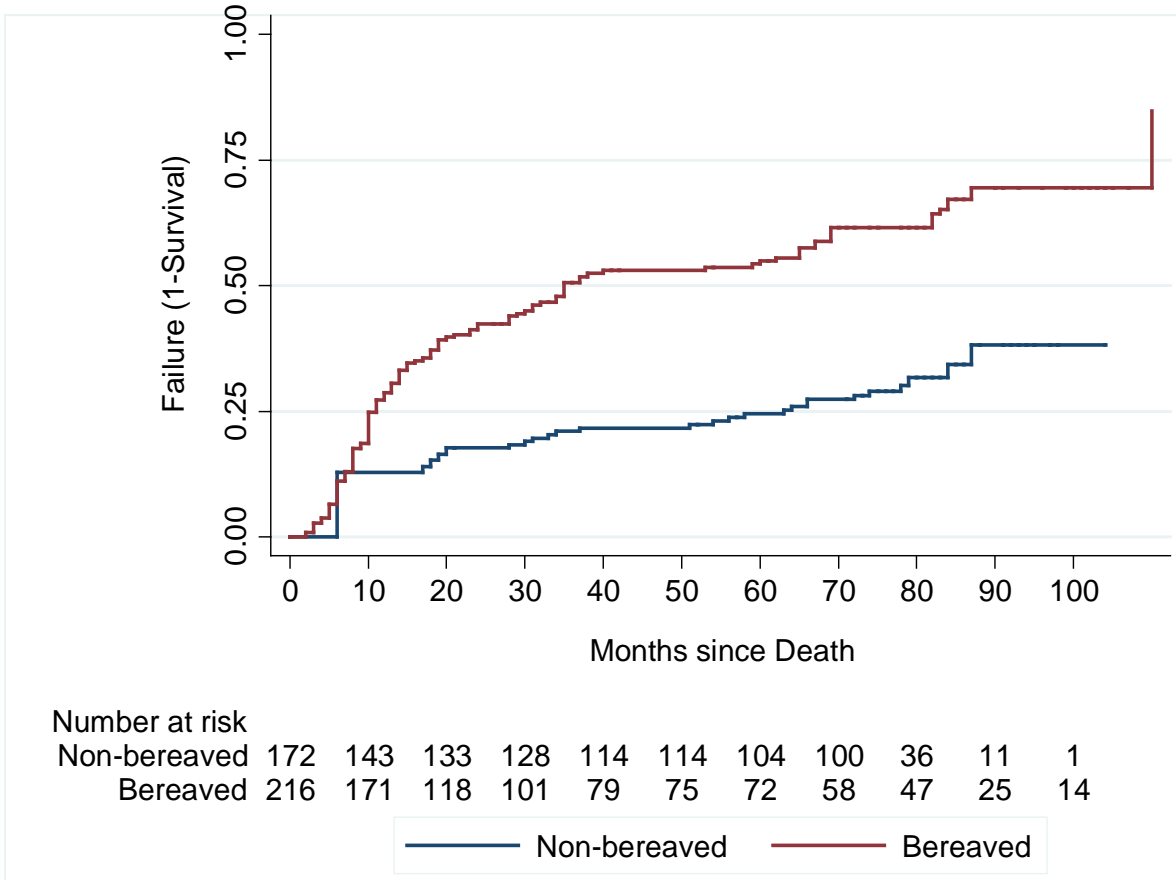

## Supplementary Material References

1. Foa EB, Johnson KM, Feeny NC, Treadwell KR. The Child PTSD Symptom Scale: A preliminary examination of its psychometric properties. *J Clin Child Psychol*. 2001;30(3):376-384.
2. Foa EB, Riggs DS, Dancu CV, Rothbaum BO. Reliability and validity of a brief instrument for assessing post-traumatic stress disorder. *Journal of traumatic stress*. 1993;6(4):459-473
3. Birmaher B, Khetarpal S, Brent D, Cully M, Balach L, Kaufman J, Neer SM. The Screen for Child Anxiety Related Emotional Disorders (SCARED): Scale construction and psychometric characteristics. *J Am Acad Child Adolesc Psychiatry*. 1997;36(4):545-553.
4. Beck AT, Epstein N, Brown G, Steer RA. An inventory for measuring clinical anxiety: Psychometric properties. *J Consult Clin Psychol*. 1988;56(6):893-897.
5. Angold A, Costello EJ, Messer SC, Pickles A. Development of a short questionnaire for use in epidemiological studies of depression in children and adolescents. *Int J Methods Psychiatr Res*. 1995;5(4):237-249.
6. Beck AT, Steer RA, Carbin MG. Psychometric properties of the Beck Depression Inventory: Twenty-five years of evaluation. *J Consult Clin Psychol*. 1988;8(1):893-897.
7. Buss AH, Perry M. The Aggression Questionnaire. *J Pers Soc Psychol*. 1992;63(3):452.
8. Reynolds WM, Mazza JJ. Assessment of suicidal ideation in inner-city children and young adolescents: Reliability and validity of the Suicidal Ideation Questionnaire-JR. *School Psychology Review*. 1999;28(1):17
9. Brand AH, Johnson JH. Note on reliability of the Life Events Checklist. *Psychol Rep*. 1982;50:1274.
10. Lewinsohn PM, Rohde P, Seeley JR, Fischer SA. Age and depression: Unique and shared effects. *Psychol Aging*. 1991;6(2):247-260.
11. Chaffin M, Wherry JN, Newlin C, Crutchfield A, Dykman R. The Abuse Dimensions Inventory: Initial data on a research measure of abuse severity. *J Interpers Violence*. 1997;12(4):569-589
12. Spirito A, Stark LJ, Williams C. Development of a brief coping checklist for use with pediatric populations. *J Pediatr Psychol*. 1988;13(4):555-574.
13. Lazarus RS. Coping theory and research: past, present, and future. *Psychosom Med*. 1993;55(3):234-247.
14. Dubow EF, Ullman DG. Assessing social support in elementary school children: The survey of children's social support. *J Clin Child Psychol*. 1989;18(1):52-64
15. Zimet GD, Dahlem NW, Zimet SG, Farley GK. The Multidimensional Scale of Perceived Social Support. *J Pers Assess*. 1988;52(1):30-41.
16. Olson D, Portner J, Lavee Y. *Family Adaptability and Cohesion Evaluation Scales (FACES-II)* Minneapolis: University of Minnesota Press; 1985.
